# Supplementary material for: Different effects of soybean protein and its derived peptides on the growth and metabolism of Bifidobacterium animalis subsp. animalis JCM 1190
Source: Royal Society of Chemistry journal article supplement (doi:10.1039/d1fo00480h), 2021-01-01
Supplement: d1fo00480h2.pdf [file d1fo00480h2.pdf]

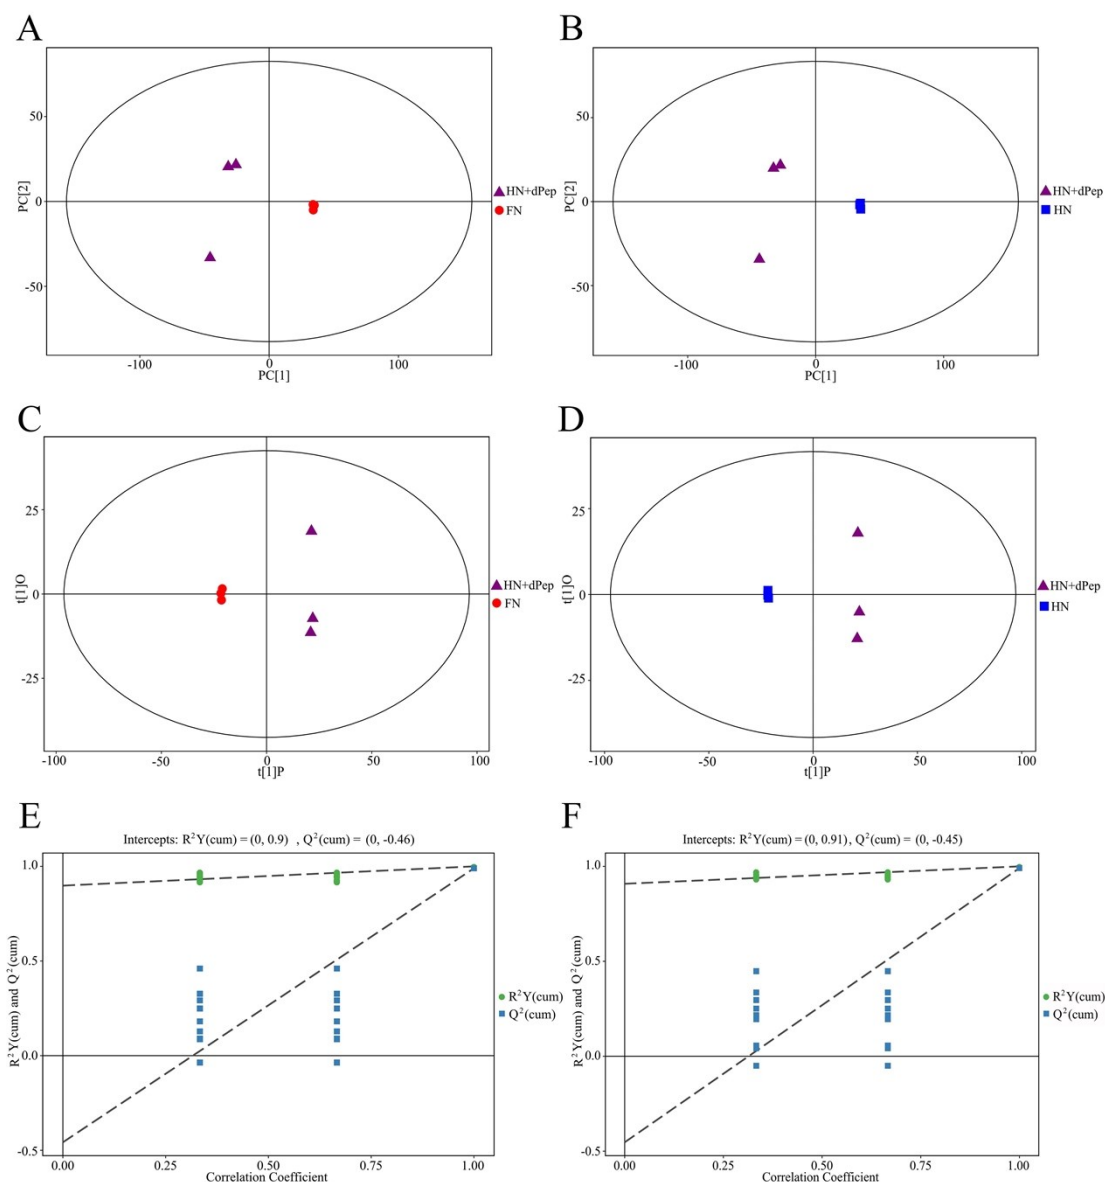

Fig. S1 The score scatter plot of the PCA model for (A) HN+dPep vs. FN. (B) HN+dPep vs. HN. The x-axis PC [1] and y-axis PC [2] represent the scores of the first and second principal components, respectively. The score scatter plot of the OPLS-DA model for (C) HN+dPep vs. FN. (D) HN+dPep vs. HN. The x-axis t [1] P represents the predicted principal component score of the first principal component, while the y-axis t [1] O represents the orthogonal principal component score. The permutation test of the OPLS-DA model for (E) HN+dPep vs. FN. (F) HN+dPep vs. HN. The x-axis represents the retention of the permutation test, while the y-axis represents the  $R^2Y$  or  $Q^2$  values. The two dashed lines represent the regression lines of  $R^2Y$  and  $Q^2$ , respectively. FN, MRS (DeMan, Rogosa, Sharpe) medium; HN, MRS medium without half nitrogen source; HN+dPep, HN supplemented digested soybean peptides.
