# Supplementary material for: Different effects of soybean protein and its derived peptides on the growth and metabolism of Bifidobacterium animalis subsp. animalis JCM 1190
Source: Royal Society of Chemistry journal article supplement (doi:10.1039/d1fo00480h), 2021-01-01
Supplement: d1fo00480h3.pdf [file d1fo00480h3.pdf]

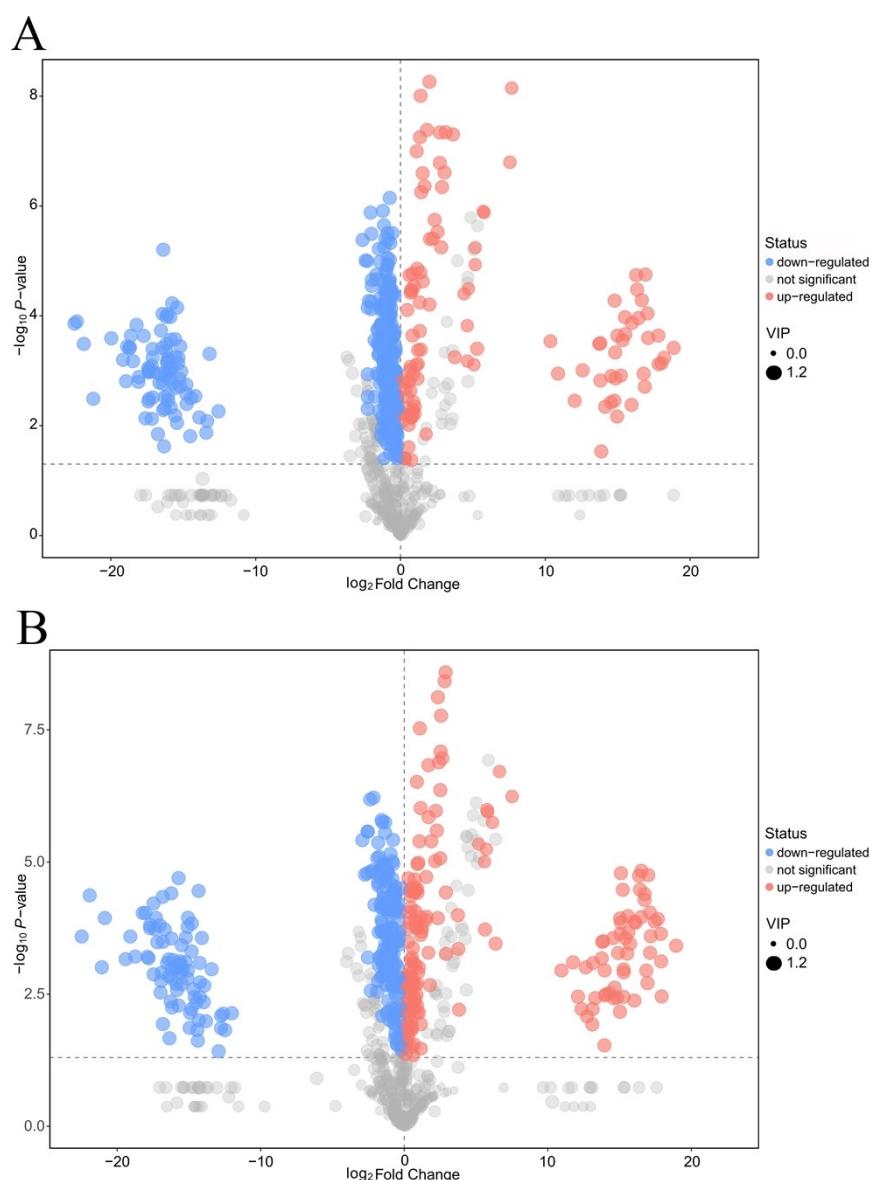

Fig. S2 A volcano plot of differential metabolites for (A) HN+dPep vs. FN. (B) HN+dPep vs. HN. Each point represents a metabolite, while the x-axis represents multiple changes in each substance in the group. The y-axis represents the  $p$ -value of the student's  $t$ -test, while the size of the scatter represents the VIP value of the OPLS-DA model. Red dots indicate up-regulated metabolites with significant differences ( $p < 0.05$ ,  $VIP > 1$ ), blue dots indicate down-regulated metabolites with significant differences ( $p < 0.05$ ,  $VIP > 1$ ), and gray dots indicate different metabolites with no significant differences ( $p > 0.05$  or  $VIP < 1$ ). FN, MRS (DeMan, Rogosa, Sharpe) medium; HN, MRS medium without half nitrogen source; HN+dPep, HN supplemented digested soybean peptides.
