# Supplementary material for: Different effects of soybean protein and its derived peptides on the growth and metabolism of Bifidobacterium animalis subsp. animalis JCM 1190
Source: Royal Society of Chemistry journal article supplement (doi:10.1039/d1fo00480h), 2021-01-01
Supplement: d1fo00480h4.pdf [file d1fo00480h4.pdf]

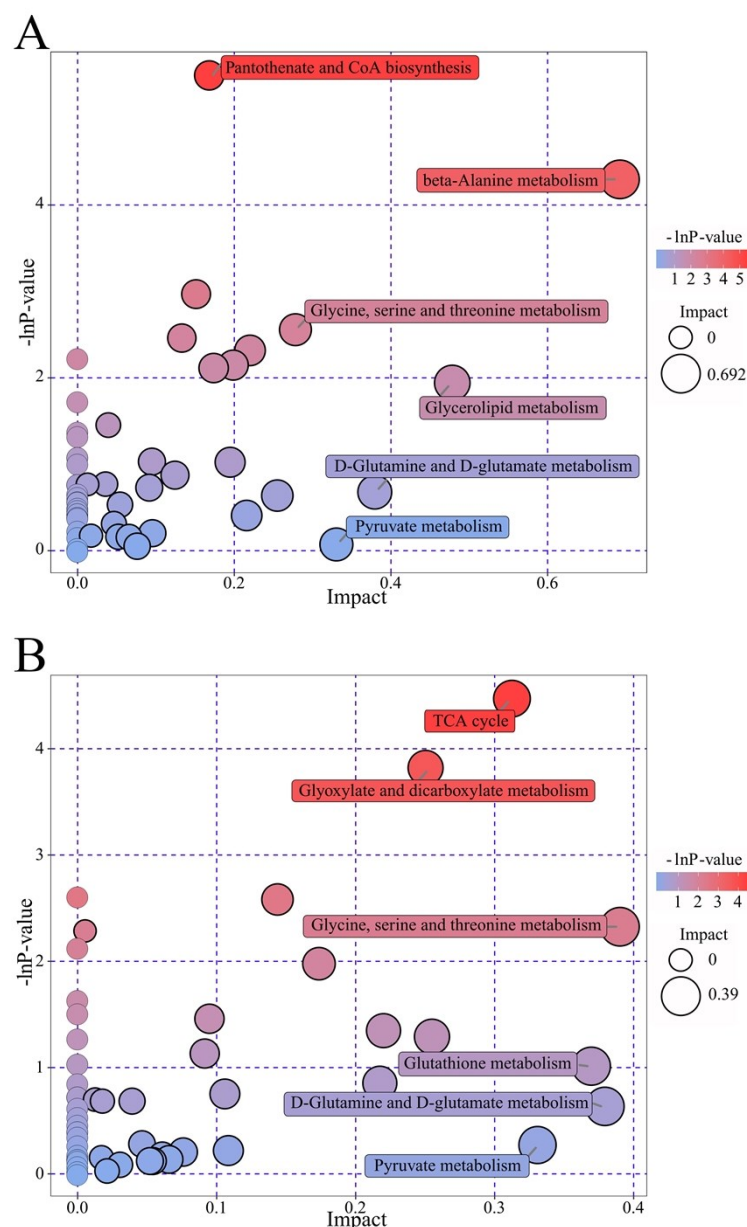

Fig. S3 The pathway analysis for (A) HN+dPep vs. FN. (B) HN+dPep vs. HN. Each bubble represents a metabolic pathway. The x-axis and bubble size represent the size of the influencing factor of the pathway during the topological analysis, while the y-axis and bubble color represent the  $p$ -value of the enrichment analysis. FN, MRS (DeMan, Rogosa, Sharpe) medium; HN, MRS medium without half nitrogen source; HN+dPep, HN supplemented digested soybean peptides.
