# Supplementary material for: Different effects of soybean protein and its derived peptides on the growth and metabolism of Bifidobacterium animalis subsp. animalis JCM 1190
Source: Royal Society of Chemistry journal article supplement (doi:10.1039/d1fo00480h), 2021-01-01
Supplement: d1fo00480h5.pdf [file d1fo00480h5.pdf]

Table S1. The composition of different nitrogen-sourced media.

| Ingredient                     | Different nitrogen-sourced media |             |                 |                  |                 |                  |
|--------------------------------|----------------------------------|-------------|-----------------|------------------|-----------------|------------------|
|                                | FN<br>(g/L)                      | HN<br>(g/L) | HN+Pep<br>(g/L) | HN+dPep<br>(g/L) | HN+Pro<br>(g/L) | HN+dPro<br>(g/L) |
| Peptone                        | 10                               | 5           | 5               | 5                | 5               | 5                |
| Beef extract                   | 10                               | 2.5         | 2.5             | 2.5              | 2.5             | 2.5              |
| Yeast extract                  | 5                                | 2           | 2               | 2                | 2               | 2                |
| Pep                            | -                                | -           | 11.66           | -                | -               | -                |
| dPep                           | -                                | -           | -               | 16.51            | -               | -                |
| Pro                            | -                                | -           | -               | -                | 12.43           | -                |
| dPro                           | -                                | -           | -               | -                | -               | 15.32            |
| Glucose                        | 5                                | 5           | 5               | 5                | 5               | 5                |
| Potassium dihydrogen phosphate | 0.33                             | 0.33        | 0.33            | 0.33             | 0.33            | 0.33             |
| Dipotassium hydrogenphosphate  | 0.45                             | 0.45        | 0.45            | 0.45             | 0.45            | 0.45             |
| Ammonium chloride              | 1                                | 1           | 1               | 1                | 1               | 1                |
| Magnesium sulphate             | 0.1                              | 0.1         | 0.1             | 0.1              | 0.1             | 0.1              |
| L-Cysteine                     | 0.5                              | 0.5         | 0.5             | 0.5              | 0.5             | 0.5              |
| Sodium sulfide                 | 0.5                              | 0.5         | 0.5             | 0.5              | 0.5             | 0.5              |
| Resazurin                      | 0.001                            | 0.001       | 0.001           | 0.001            | 0.001           | 0.001            |

Pep, Soybean peptides; dPep, Digested soybean peptides; Pro, Soybean protein; dPro, Digested soybean protein; FN, MRS (DeMan, Rogosa, Sharpe) medium; HN, MRS medium without half nitrogen source; HN+Pep, HN supplemented Pep; HN+dPep, HN supplemented dPep; HN+Pro, HN supplemented Pro; HN+dPro, HN supplemented dPro.
